## **Potent neutralization antibodies induced by a recombinant trimeric Spike protein vaccine candidate containing PIKA adjuvant for COVID-19**

Jiao Tong<sup>1</sup>, Chenxi Zhu<sup>1</sup>, Hanyu Lai<sup>1</sup>, Chunchao Feng<sup>1</sup>, Dapeng Zhou<sup>1,\*</sup>

<sup>1</sup>*Tongji University School of Medicine, Shanghai, 200092, China*

\*Correspondence author: [dapengzhoulab@tongji.edu.cn](mailto:dapengzhoulab@tongji.edu.cn)

### **Abstract**

Neutralizing antibodies are critical to prevent corona virus infection. The structures of immunogens to elicit most potent neutralization antibodies are still under investigation. Here we tested the immunogenicity of the trimeric, full length Spike protein with 2 proline mutations to preserve its prefusion conformation. Recombinant trimeric Spike protein expressed by CHO cells was used with polyI:C (PIKA) adjuvant to immunize mice by 0-7-14 day schedule. The results showed that Spike-specific antibody was induced at day 21 with titer of more than 50,000 in average as measured by direct binding to Spike protein. The titer of neutralization reached more than 1000 in average when tested by a pseudo-virus system, using monoclonal antibodies (40592-MM57 and 40591-MM43) with neutralizing IC50 at 1  $\mu$ g/ml as standards. Protein/peptide array showed that the antibodies induced by trimeric S protein vaccine bind similarly to natural infection with the receptor binding domain (RBD) as major immunodominant region. No linear epitopes were found in RBD, although several linear epitopes were found in C-terminal domain right after RBD, and heptad repeat regions. Our study supports the efficacy of recombinant

trimeric Spike protein vaccine candidate for COVID-19, with excellent safety and readiness for storage and distribution in developing countries.

## **Introduction**

It is generally accepted that effective COVID-19 vaccines are the only approach to end the global pandemic. Currently, inactivated virus (1), Adenoviral vector-based vaccines (2-4) and mRNA vaccines (5-6) encoding Spike protein have been approved for urgent use in China, US, and other countries. However, these vaccines do not meet the need for vaccination in all countries. For example, the inactivated COVID-19 vaccines are limited by manufacturing capacity due to difficulties in producing live viruses. The currently approved mRNA vaccines require cold-chain transport by freezers at -80 °C or -20 °C, although thermostable mRNA vaccine candidate has been invented (7). The other unanswered question is the duration of immune responses induced by above vaccines.

Vaccines based on recombinant proteins and adjuvants have been approved for HBV, HPV, and Influenza. The manufacturing of recombinant proteins and adjuvants are easy to scale-up, that provides unlimited supply of immunogens. Such vaccines have been proven to be safe and effective. More importantly, the immune responses often last for years. Thus vaccines with the recombinant Spike protein and adjuvants as components may be among best choices for developing countries to end the COVID-19 pandemic.

Both full-length Spike protein and engineered subunit of Spike protein containing

receptor binding domain have been reported as vaccine candidates (8-18). In this study, we report a trimeric full length Spike protein containing PIKA (polyI:C) adjuvant. We chose such composition for several reasons: 1) The full length Spike protein contains more T cell epitopes that are essential for inducing viral-specific T cells; 2) The conformation of the trimeric form of Spike protein is similar to S-trimer structure in natural virions; 3) The PIKA (polyI:C) adjuvant has shown excellent safety and efficacy in rabies vaccines by 0-7-14 vaccination schedule (19).

## **Results**

### **Trimeric S protein induced higher neutralizing antibodies**

The titer of antibody binding to Spike trimer protein was above 50,000 in average after 3 immunizations by trimeric Spike protein with polyI:C adjuvant. Using a pseudo-virus system, we determined the neutralizing titer to be higher than 1000 in average. Two monoclonal antibodies (40592-MM57 and 40591-MM43) with known neutralizing activities were used as standards for neutralization assays (with IC<sub>50</sub> at 1 µg/ml). With same dose of adjuvant and proteins, trimeric Spike protein induced significantly higher neutralizing antibodies than monomeric Spike protein (Figure 1).

### **Trimeric S protein induced similar epitope patterns as natural infection**

To understand the epitopes of antibodies induced by trimeric Spike protein vaccine, we performed protein/peptide array containing recombinant RBD, S1, and linear peptides of Spike protein (20). Serum from mice vaccinated by trimeric Spike protein vaccine showed strongest binding to RBD, S1 subunit, and S proteins. However,

linear epitopes were only observed in the C-terminal domain right after RBD, and heptad repeat regions (Figure 2). Few linear epitopes were found for RBD region, indicating that the observed antibody binding to RBD region are non-linear conformational epitopes. These results are highly consistent with the epitope patterns of serum from patients with natural infection of COVID-19 (21-22). Our data support the hypothesis that the trimeric Spike protein induced antibody responses similar to natural virions.

## **Discussion**

### **The neutralizing versus binding ratio of vaccine induced antibodies**

The recombinant trimeric Spike protein with polyI:C adjuvant induced neutralizing antibodies with the titer higher than 1000 in average. The comparison to antibody titers induced by mRNA vaccine, inactivated virus and adenoviral vectors remain to be studied. According to previous studies by Walsh et al. (23), the ratio of neutralizing/binding ratio of antibodies induced by BTN vaccine is about 10 fold lower than antibodies from natural infected patients (1:7 by natural infection as compared to 1:20 to 1:40 by vaccination). The mechanisms for lower neutralizing/binding ratio might be due to the incomplete translation, and/or incorrect folding of mRNA encoding Spike protein. The neutralizing/binding ratio of antibodies induced by trimeric Spike protein in human individuals will be evaluated in near future when human subjects are vaccinated.

### **The epitope map of antibody induced by vaccines versus natural infection**

The similar antibody binding epitopes identified by protein/peptide array suggest that

the trimeric recombinant vaccine's confirmation is similar to Spike protein of natural virions. Noteworthy, monoclonal antibodies with neutralizing activities have been identified to recognize N-terminal domain (NTD, 24). Ma et al identified neutralizing antibodies which bind to C-terminal domain right after RBD (CTD) and fusion peptide (FP) region (21). Structural analysis by Cryo-EM and molecular modeling indicated that heptad repeat (HR) regions are surface-exposed and serve as targets for neutralizing antibody binding (25-27). Clearly, vaccines that can target the non-RBD region play important role in preventing the pandemic of mutant viruses with RBD mutations that escape the RBD-focused vaccines.

## **Materials and methods**

### **Expression and purification of the recombinant SARS-CoV-2 Spike protein trimer and spike protein monomer**

To express the prefusion S ectodomain, a gene encoding residues 1–1208 of 2019-nCoV S (GenBank: MN908947) with proline substitutions at residues 986 and 987, a “GSAS” substitution at the furin cleavage site (residues 682–685), a C-terminal T4 fibrin trimerization motif, and an 8XHisTag was synthesized and cloned into the pcDNA3.1 vector. The plasmid was transfected to 293T cells and the recombinant S protein trimers were purified by Ni-NTA (nickel- nitrilotriacetic acid) chromatography (QIAGEN, Germany), followed by size exclusion to further purify the trimers. The purified trimers were verified by SDS-PAGE analysis under non-reducing conditions.

### **Vaccination in mice**

Animal experiments were approved by the institutional board of Tongji University School of Medicine. Purified recombinant SARS-CoV-2 S-trimer-His tagged protein, or Spike protein monomer (25) was resuspended in PBS (pH 7.4) with PIKA adjuvant (19, TLR3 agonist provided by Yisheng Biopharma Ltd, China). C57BL/6 mice at 6 to 8 weeks old were immunized by intramuscular injection of PIKA-S-trimer vaccine or PIKA-S-monomer vaccine. Every mouse was immunized by 5  $\mu$ g of S-trimer or S-monomer protein and 50  $\mu$ g of PIKA adjuvant. Mice were immunized on Day 0, Day 7 and Day 14. Sera were collected on Day 21.

### **S-protein specific antibody determined by ELISA**

To measure the Spike-specific antibody, 96-well microplate (NUNC-Immuno, Thermo, Waltham, MA) was coated by 50  $\mu$ l 1  $\mu$ g/ml S-trimer in PBS (pH 7.4) at 37°C for one hour, washed five times by 0.05% tween in PBS (PBS/T) on a mini-shaker. The plates were blocked by 1% bovine serum albumin (Sigma, St Louis, MO) in PBS at 37°C for one hour and washed by PBS/T for five times. Sera were diluted 25 times in the first well followed by five-fold serial dilution for ten times. Sera were incubated at 37 °C with plate-bound S protein for one hour and washed with PBS/T for five times. Then goat anti-mouse IgG conjugated HRP (Southern Biotech, Birmingham, Alabama) was added with 5000 fold dilution in PBS, and incubated at 37 °C for one hour. After washing for five times, chromogenic substrates were added and incubated for half an hour. The reaction was stopped with

H<sub>2</sub>SO<sub>4</sub> solution (1M). The absorbance was measured at 450 nm and the antibody titer was calculated with GraphPad Prism 7.0 (San Diego, CA).

### **Protein/peptide array**

The protein/peptide array was performed as described (21). Briefly, peptide-BSA conjugates as well as S protein, S1 protein, RBD protein, and other protein of SARS-CoV-2, were printed in triplicate on PATH substrate slide (Grace Bio-Labs, Oregon, USA) to generate identical arrays in a 1 x 7 subarray format using Super Marathon printer (Arrayjet, UK). The microarrays were stored at -80°C until use. The arrays stored at -80°C were warmed to room temperature and then incubated in blocking buffer (3% BSA in PBS buffer with 0.1% Tween 20) for 3 h. A total of 400 µL of diluted sera or antibodies was incubated with each subarray for 2 h. The arrays were washed with PBST and bound antibodies were detected by incubating with Cy3-conjugated goat anti-mouse IgG (Jackson ImmunoResearch, PA, USA), which were diluted for 1: 1,000 in PBST. The incubation was carried out at room temperature for 1 h. The microarrays were then washed with 1×PBST and dried by centrifugation at room temperature and scanned by LuxScan 10K-A (CapitalBio Corporation, Beijing, China) with the parameters set as 95% laser power/ PMT 480. The fluorescent intensity was extracted by GenePix Pro 6.0 software (Molecular Devices, CA, USA).

### **SARS-CoV-2 pseudo-virus production.**

The Extracellular domain of SARS-CoV-2 spike protein of that (GenBank: MN908947) was engineered in a pcDNA3CMV-based-plasmid as

Zhou-COVID-19-Spike (Plasmid #161029, Addgene) to assemble pseudo-virus more efficiently. Portions of VSV-G for production of pseudo-virus was used to replace the signal peptide and transmembrane region. The plasmids of 9 $\mu$ g pHAGE-luciferase-GFP, psPAX2 and Zhou-COVID-19-Spike were co-transfected into HEK293T cells by using 1 $\mu$ g/mL polyetherimide (Polysciences, Warrington, PA) in DMEM medium containing 10% FCS. After 48 and 72 hours, the supernatant was harvested and pooled. The supernatant containing pseudo-virus was centrifuged at 3000g and filtered through a 0.45 $\mu$ m sterilized membrane (Millipore, Burlington, MA). The titer of virus generated by engineered Zhou-COVID-19-Spike plasmid is ten-fold higher than non-engineered Spike protein sequence (data not shown), and remained stable after two rounds of freeze-thawing. The virus was stored in -80 °C as culture supernatant and used directly for antibody neutralization assays without further purification.

### **Neutralization of serum antibody against pseudovirus infection**

A 293T-ACE2 cell line (293T/ACE2) expressing human ACE2 was used for virus neutralization assay. 3 $\times$ 10<sup>4</sup> cells per well were seeded on 96 well plates 12 hours before infection. 50  $\mu$ L pseudo-virus was incubated with equal volume of serially diluted antibodies for one hour at 37 °C. Monoclonal antibodies 40592-MM57 and 40591-MM43 (Sinobiological, Beijing, China) were tested as standards in parallel, in the concentrations ranging from 0.1  $\mu$ g/mL to 100  $\mu$ g/mL. The mixtures of pseudo-viruses and antibodies were added to 293T/ACE2 cells. After 12 hour



co-incubation, the co-culture medium was replaced with fresh DMEM containing 10% fetal bovine serum, and the samples were incubated for an additional 48 hours at 37 °C. Luciferase substrate (Promega, Madison, WI) was added at 100 µL per well to lyse the cells. The fluorescence was read by a microplate reader (TECAN). The 50% neutralization dose was calculated using GraphPad Prism 7.0 (San Diego, CA).

### **Acknowledgement**

We thank Dr. Ming-liang Ma and Prof Sheng-ce Tao (Shanghai Jiao Tong University) for help on protein and peptide array analysis. This work was supported by National Key Research and Development Plan grant 2017YFA0505901, Fundamental Research Funds for the Central Universities 22120200163, National Natural Science Foundation of China grant 31870972, Shanghai Science and Technology Commission grant 15002360172 , the Outstanding Clinical Discipline Project of Shanghai Pudong (PWYgy2018–10).

### **Conflict of interest disclosures**

The authors declare no conflict of interest.

### **Reference**

1. Wu Z, Hu Y, Xu M, Chen Z, Yang W, Jiang Z, Li M, Jin H, Cui G, Chen P, Wang L, Zhao G, Ding Y, Zhao Y, Yin W. Safety, tolerability, and immunogenicity of an inactivated SARS-CoV-2 vaccine (CoronaVac) in healthy adults aged 60 years and older: a randomised, double-blind,

placebo-controlled, phase 1/2 clinical trial. *Lancet Infect Dis.* 2021 Feb 3:S1473-3099(20)30987-7.

2. Zhu FC, Li YH, Guan XH, Hou LH, Wang WJ, Li JX, Wu SP, Wang BS, Wang Z, Wang L, Jia SY, Jiang HD, Wang L, Jiang T, Hu Y, Gou JB, Xu SB, Xu JJ, Wang XW, Wang W, Chen W. Safety, tolerability, and immunogenicity of a recombinant adenovirus type-5 vectored COVID-19 vaccine: a dose-escalation, open-label, non-randomised, first-in-human trial. *Lancet.* 2020 Jun 13;395(10240):1845-1854.

3. Folegatti PM, Ewer KJ, Aley PK, Angus B, Becker S, Belij-Rammerstorfer S, Bellamy D, Bibi S, Bittaye M, Clutterbuck EA, Dold C, Faust SN, Finn A, Flaxman AL, Hallis B, Heath P, Jenkin D, Lazarus R, Makinson R, Minassian AM, Pollock KM, Ramasamy M, Robinson H, Snape M, Tarrant R, Voysey M, Green C, Douglas AD, Hill AVS, Lambe T, Gilbert SC, Pollard AJ; Oxford COVID Vaccine Trial Group. Safety and immunogenicity of the ChAdOx1 nCoV-19 vaccine against SARS-CoV-2: a preliminary report of a phase 1/2, single-blind, randomised controlled trial. *Lancet.* 2020 Aug 15;396(10249):467-478.

4. Logunov DY, Dolzhikova IV, Zubkova OV, Tukhvatulin AI, Shcheblyakov DV, Dzharullaeva AS, Grousova DM, Erokhova AS, Kovyrshina AV, Botikov AG, Izhaeva FM, Popova O, Ozharovskaya TA, Esmagambetov IB, Favorskaya IA, Zrelkin DI, Voronina DV, Shcherbinin DN, Semikhin AS, Simakova YV, Tokarskaya EA, Lubenets NL, Egorova DA, Shmarov MM, Nikitenko NA, Morozova LF, Smolyarchuk EA, Kryukov EV, Babira VF, Borisevich SV, Naroditsky BS, Gintsburg AL. Safety and immunogenicity of an rAd26 and rAd5 vector-based heterologous prime-boost COVID-19 vaccine in two formulations: two open, non-randomised phase 1/2 studies from Russia. *Lancet.* 2020 Sep 26;396(10255):887-897.

5. Polack FP, Thomas SJ, Kitchin N, Absalon J, Gurtman A, Lockhart S, Perez JL, Pérez Marc G, Moreira ED, Zerbini C, Bailey R, Swanson KA, Roychoudhury S, Koury K, Li P, Kalina WV, Cooper D, Frenck RW Jr, Hammitt LL, Türeci Ö, Nell H, Schaefer A, Ünal S, Tresnan DB, Mather S, Dormitzer PR, Şahin U, Jansen KU, Gruber WC; C4591001 Clinical Trial Group. Safety and Efficacy of the BNT162b2 mRNA Covid-19 Vaccine. *N Engl J Med*. 2020 Dec 31;383(27):2603-2615.
6. Jackson LA, Anderson EJ, Roupael NG, Roberts PC, Makhene M, Coler RN, McCullough MP, Chappell JD, Denison MR, Stevens LJ, Pruijssers AJ, McDermott A, Flach B, Doria-Rose NA, Corbett KS, Morabito KM, O'Dell S, Schmidt SD, Swanson PA 2nd, Padilla M, Mascola JR, Neuzil KM, Bennett H, Sun W, Peters E, Makowski M, Albert J, Cross K, Buchanan W, Pikaart-Tautges R, Ledgerwood JE, Graham BS, Beigel JH; mRNA-1273 Study Group. An mRNA Vaccine against SARS-CoV-2 - Preliminary Report. *N Engl J Med*. 2020 Nov 12;383(20):1920-1931.
7. Zhang NN, Li XF, Deng YQ, Zhao H, Huang YJ, Yang G, Huang WJ, Gao P, Zhou C, Zhang RR, Guo Y, Sun SH, Fan H, Zu SL, Chen Q, He Q, Cao TS, Huang XY, Qiu HY, Nie JH, Jiang Y, Yan HY, Ye Q, Zhong X, Xue XL, Zha ZY, Zhou D, Yang X, Wang YC, Ying B, Qin CF. A Thermostable mRNA Vaccine against COVID-19. *Cell*. 2020 Sep 3;182(5):1271-1283.e16.
8. Chen WH, Hotez PJ, Bottazzi ME. Potential for developing a SARS-CoV receptor-binding domain (RBD) recombinant protein as a heterologous human vaccine against coronavirus infectious disease (COVID)-19. *Hum Vaccin Immunother*. 2020 Jun 2;16(6):1239-1242.
9. Wang Y, Wang L, Cao H, Liu C. SARS-CoV-2 S1 is superior to the RBD as a COVID-19 subunit vaccine antigen. *J Med Virol*. 2021 Feb;93(2):892-898.

10. Kim E, Erdos G, Huang S, Kenniston TW, Balmert SC, Carey CD, Raj VS, Epperly MW, Klimstra WB, Haagmans BL, Korkmaz E, Falo LD Jr, Gambotto A. Microneedle array delivered recombinant coronavirus vaccines: Immunogenicity and rapid translational development. *EBioMedicine*. 2020 May;55:102743.
11. Guebre-Xabier M, Patel N, Tian JH, Zhou B, Maciejewski S, Lam K, Portnoff AD, Massare MJ, Frieman MB, Piedra PA, Ellingsworth L, Glenn G, Smith G. NVX-CoV2373 vaccine protects cynomolgus macaque upper and lower airways against SARS-CoV-2 challenge. *Vaccine*. 2020 Nov 25;38(50):7892-7896.
12. Qi X , Ke B , Feng Q , Yang D , Lian Q , Li Z , Lu L , Ke C , Liu Z , Liao G . Construction and immunogenic studies of a mFc fusion receptor binding domain (RBD) of spike protein as a subunit vaccine against SARS-CoV-2 infection. *Chem Commun (Camb)*. 2020 Aug 7;56(61):8683-8686.
13. Li T, Zheng Q, Yu H, Wu D, Xue W, Xiong H, Huang X, Nie M, Yue M, Rong R, Zhang S, Zhang Y, Wu Y, Wang S, Zha Z, Chen T, Deng T, Wang Y, Zhang T, Chen Y, Yuan Q, Zhao Q, Zhang J, Gu Y, Li S, Xia N. SARS-CoV-2 spike produced in insect cells elicits high neutralization titres in non-human primates. *Emerg Microbes Infect*. 2020 Dec;9(1):2076-2090.
14. Liu X, Drelich A, Li W, Chen C, Sun Z, Shi M, Adams C, Mellors JW, Tseng CT, Dimitrov DS. Enhanced elicitation of potent neutralizing antibodies by the SARS-CoV-2 spike receptor binding domain Fc fusion protein in mice. *Vaccine*. 2020 Oct 27;38(46):7205-7212.
15. Chen WH, Tao X, Agrawal AS, Algaissi A, Peng BH, Pollet J, Strych U, Bottazzi ME, Hotez PJ, Lustigman S, Du L, Jiang S, Tseng CK. Yeast-expressed SARS-CoV recombinant receptor-binding domain (RBD219-N1) formulated with aluminum hydroxide induces protective

immunity and reduces immune enhancement. *Vaccine*. 2020 Nov 3;38(47):7533-7541.

16. Haun BK, Lai CY, Williams CA, Wong TAS, Lieberman MM, Pessaint L, Andersen H, Lehrer AT. CoVaccine HT Adjuvant Potentiates Robust Immune Responses to Recombinant SARS-CoV-2 Spike S1 Immunization. *Front Immunol*. 2020 Oct 30;11:599587.

17. Su QD, Zou YN, Yi Y, Shen LP, Ye XZ, Zhang Y, Wang H, Ke H, Song JD, Hu KP, Cheng BL, Qiu F, Yu PC, Zhou WT, Zhao R, Cao L, Dong GF, Bi SL, Wu GZ, Gao GF, Zheng J. Recombinant SARS-CoV-2 RBD with a built in T helper epitope induces strong neutralization antibody response. *Vaccine*. 2021 Jan 20;39(8):1241-7.

18. Dai L, Zheng T, Xu K, Han Y, Xu L, Huang E, An Y, Cheng Y, Li S, Liu M, Yang M, Li Y, Cheng H, Yuan Y, Zhang W, Ke C, Wong G, Qi J, Qin C, Yan J, Gao GF. A Universal Design of Betacoronavirus Vaccines against COVID-19, MERS, and SARS. *Cell*. 2020 Aug 6;182(3):722-733.e11.

19. Kalimuddin S, Wijaya L, Chan YFZ, Wong AWL, Oh HML, Wang LF, Kassim JA, Zhao J, Shi Z, Low JG. A phase II randomized study to determine the safety and immunogenicity of the novel PIKA rabies vaccine containing the PIKA adjuvant using an accelerated regimen. *Vaccine*. 2017 Dec 18;35(51):7127-7132.

20. Li Y, Lai DY, Zhang HN, Jiang HW, Tian X, Ma ML, Qi H, Meng QF, Guo SJ, Wu Y, Wang W, Yang X, Shi DW, Dai JB, Ying T, Zhou J, Tao SC. Linear epitopes of SARS-CoV-2 spike protein elicit neutralizing antibodies in COVID-19 patients. *Cell Mol Immunol*. 2020 Oct;17(10):1095-1097.

21. Poh CM, Carissimo G, Wang B, Amrun SN, Lee CY, Chee RS, Fong SW, Yeo NK, Lee WH, Torres-Ruesta A, Leo YS, Chen MI, Tan SY, Chai LYA, Kalimuddin S, Kheng SSG, Thien SY,

- Young BE, Lye DC, Hanson BJ, Wang CI, Renia L, Ng LFP. Two linear epitopes on the SARS-CoV-2 spike protein that elicit neutralising antibodies in COVID-19 patients. *Nat Commun.* 2020 Jun 1;11(1):2806.
22. Farrera-Soler L, Daguer JP, Barluenga S, Vadas O, Cohen P, Pagano S, Yerly S, Kaiser L, Vuilleumier N, Winssinger N. Identification of immunodominant linear epitopes from SARS-CoV-2 patient plasma. *PLoS One.* 2020 Sep 9;15(9):e0238089.
23. Polack FP, Thomas SJ, Kitchin N, Absalon J, Gurtman A, Lockhart S, Perez JL, Pérez Marc G, Moreira ED, Zerbini C, Bailey R, Swanson KA, Roychoudhury S, Koury K, Li P, Kalina WV, Cooper D, Frenck RW Jr, Hammitt LL, Türeci Ö, Nell H, Schaefer A, Ünal S, Tresnan DB, Mather S, Dormitzer PR, Şahin U, Jansen KU, Gruber WC; C4591001 Clinical Trial Group. Safety and Efficacy of the BNT162b2 mRNA Covid-19 Vaccine. *N Engl J Med.* 2020 Dec 31;383(27):2603-2615.
24. Chi X, Yan R, Zhang J, Zhang G, Zhang Y, Hao M, Zhang Z, Fan P, Dong Y, Yang Y, Chen Z, Guo Y, Zhang J, Li Y, Song X, Chen Y, Xia L, Fu L, Hou L, Xu J, Yu C, Li J, Zhou Q, Chen W. A neutralizing human antibody binds to the N-terminal domain of the Spike protein of SARS-CoV-2. *Science.* 2020 Aug 7;369(6504):650-655.
25. Zhou D, Tian X, Qi R, Peng C, Zhang W. Identification of 22 N-glycosites on spike glycoprotein of SARS-CoV-2 and accessible surface glycopeptide motifs: Implications for vaccination and antibody therapeutics. *Glycobiology.* 2021 Jan 9;31(1):69-80.
26. Xu C, Wang Y, Liu C, Zhang C, Han W, Hong X, Wang Y, Hong Q, Wang S, Zhao Q, Wang Y, Yang Y, Chen K, Zheng W, Kong L, Wang F, Zuo Q, Huang Z, Cong Y. Conformational dynamics of SARS-CoV-2 trimeric spike glycoprotein in complex with receptor ACE2 revealed by cryo-EM.

Sci Adv. 2021 Jan 1;7(1):eabe5575.

27. Du S, Cao Y, Zhu Q, Yu P, Qi F, Wang G, Du X, Bao L, Deng W, Zhu H, Liu J, Nie J, Zheng Y, Liang H, Liu R, Gong S, Xu H, Yisimayi A, Lv Q, Wang B, He R, Han Y, Zhao W, Bai Y, Qu Y, Gao X, Ji C, Wang Q, Gao N, Huang W, Wang Y, Xie XS, Su XD, Xiao J, Qin C. Structurally Resolved SARS-CoV-2 Antibody Shows High Efficacy in Severely Infected Hamsters and Provides a Potent Cocktail Pairing Strategy. *Cell*. 2020 Nov 12;183(4):1013-1023.e13.

### **Figure legends**

**Figure 1, Antibody titers measured by neutralizing assays and ELISA.** Mice were immunized by Spike trimer or monomer proteins containing PIKA adjuvant by a 0-7-14 day schedule. A. The neutralizing titer as measured by pseudo-virus with monoclonal antibodies 40592-MM57 and 40591-MM43 as control (with IC<sub>50</sub> at 1 µg/ml). B. Antibody titer as measured by ELISA using plate-bound trimeric Spike protein.

**Figure 2, Protein/peptide array of serum antibodies induced by Spike protein vaccines.** A. Protein array assay for sera from mice immunized by Spike trimer, Spike monomer, Non-immunized mice, using Spike (S<sub>0.17</sub> and S<sub>0.5</sub> means proteins were printed at 0.17 or 0.5 mg/ml); S1 subunit of Spike, RBD and other viral proteins. B. Linear peptide array using linear peptides of Spike proteins. CTD, C-terminal domain right after RBD (Peptides S1-93-S1-113); FP, fusion peptide (Peptides S2-14-S2-23); HR, heptad regions (Peptides S2-78).

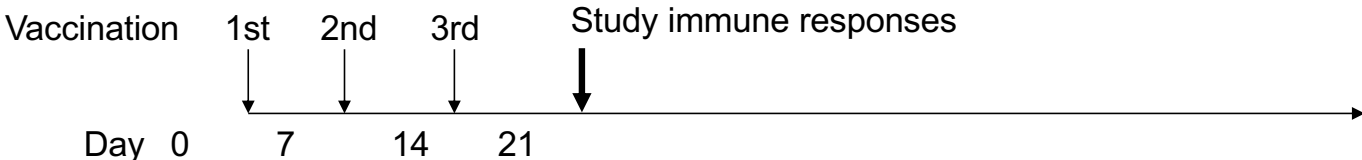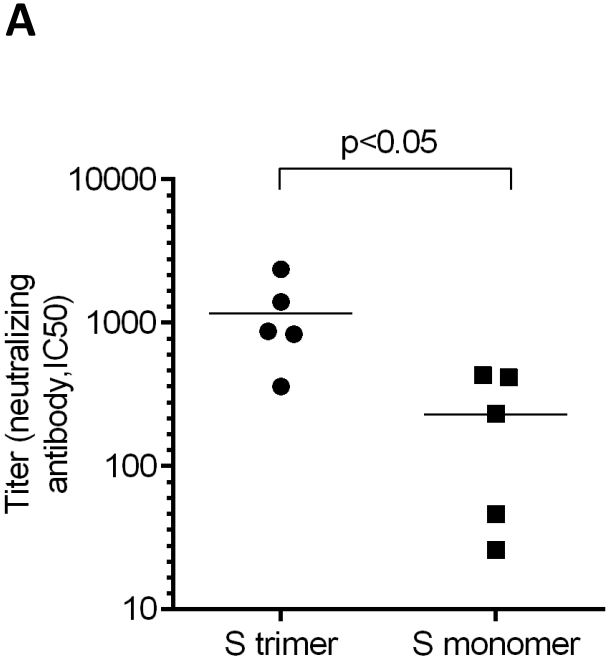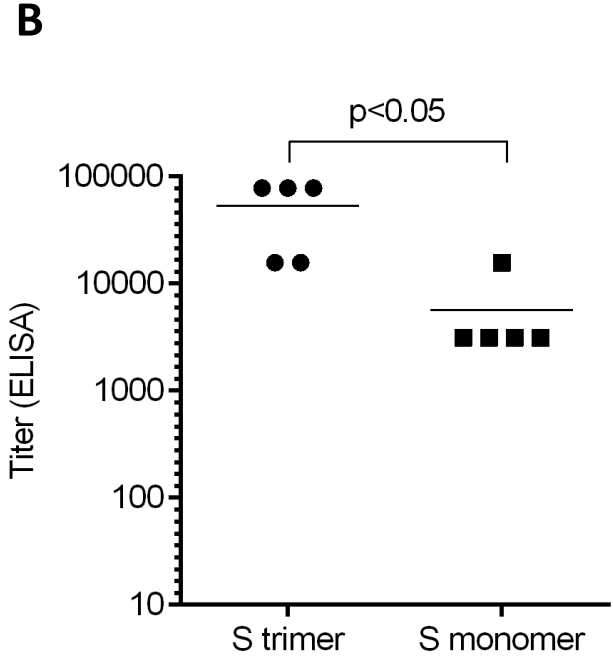



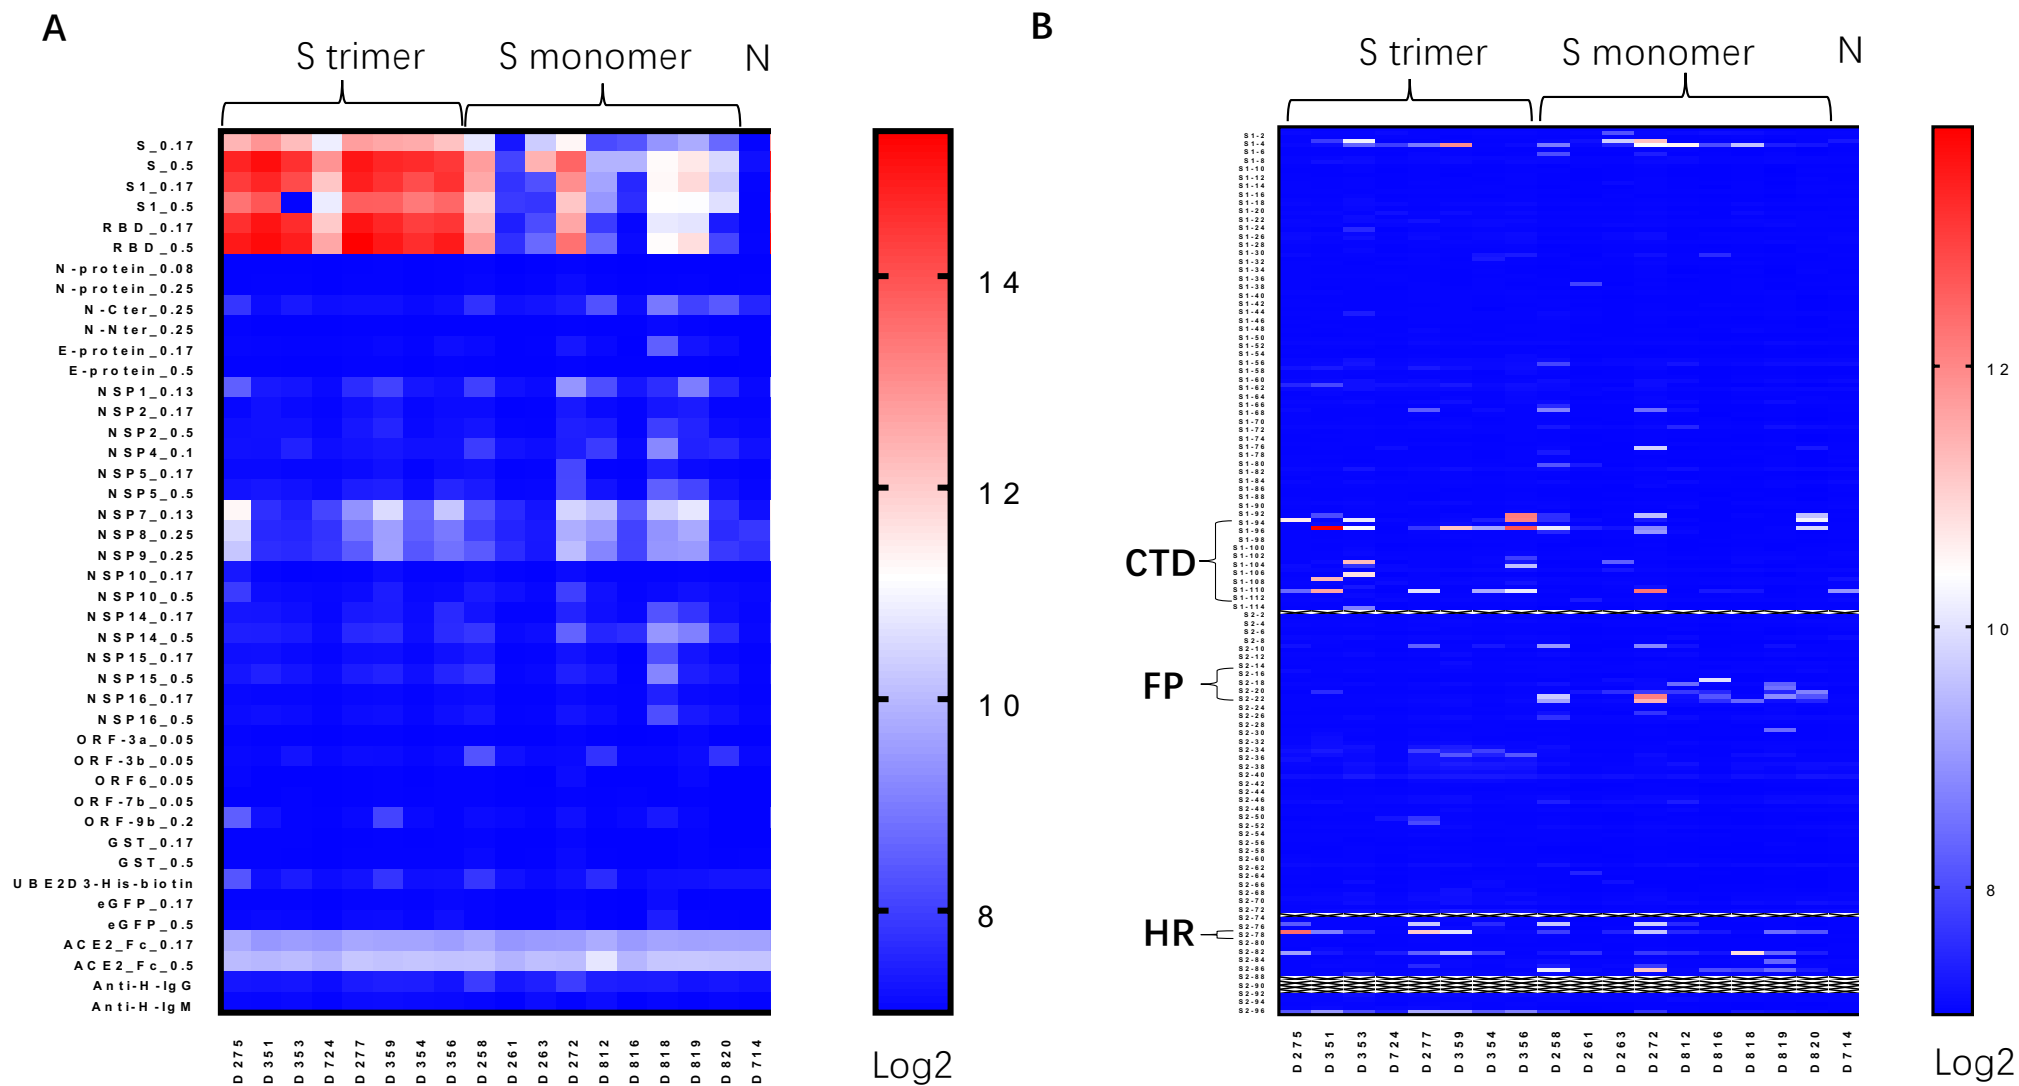

Source: https://www.biorxiv.org/content/10.1101/2021.02.17.431647v1.full.pdf
